# Supplementary figures and images for: Constraint-based probabilistic learning of metabolic pathways from tomato volatiles
Source: PubMed Central journal article supplement — Metabolomics. 2009 May 30;5(4):419–28. doi: 10.1007/s11306-009-0166-2 (PMC2794349; doi:10.1007/s11306-009-0166-2), 2009-05-30

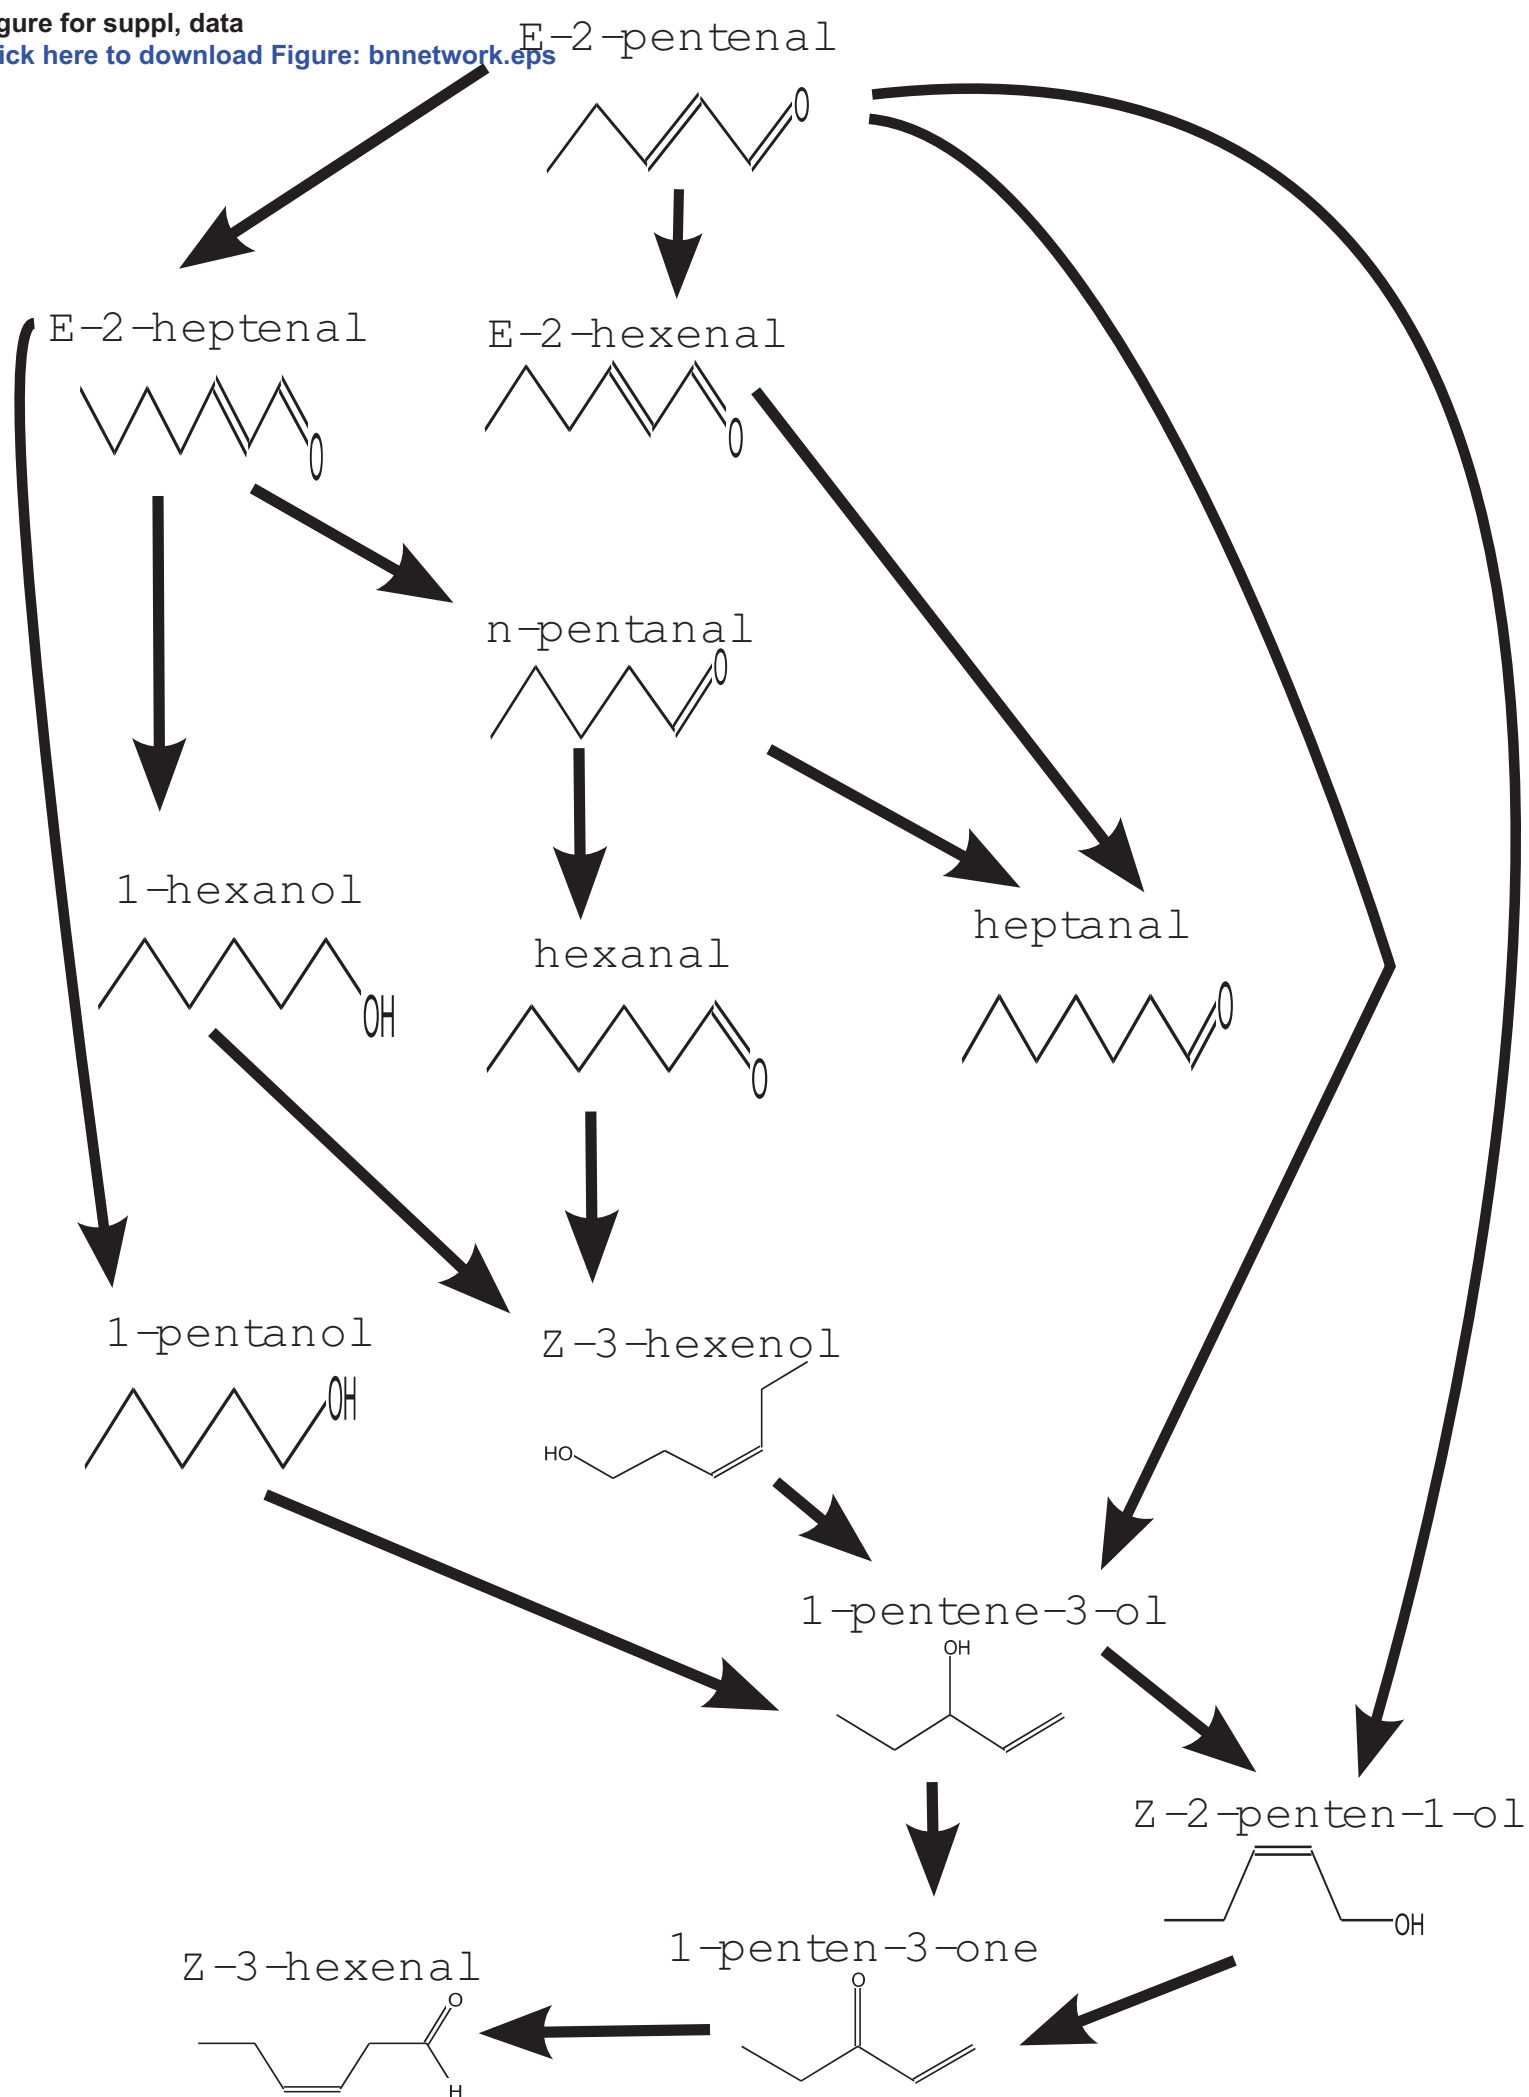

Supplement: 11306_2009_166_MOESM1_ESM.pdf [file 11306_2009_166_MOESM1_ESM.pdf]
